# Supplementary material
Source: Royal Society of Chemistry journal article supplement (doi:10.1039/d6tb00534a)
Supplement: d6tb00534a1.pdf [file d6tb00534a1.pdf]

## Supplementary Information

### Wearable near-infrared LED photothermal microneedle patch reduces periorbital wrinkles in a randomized pilot clinical trial

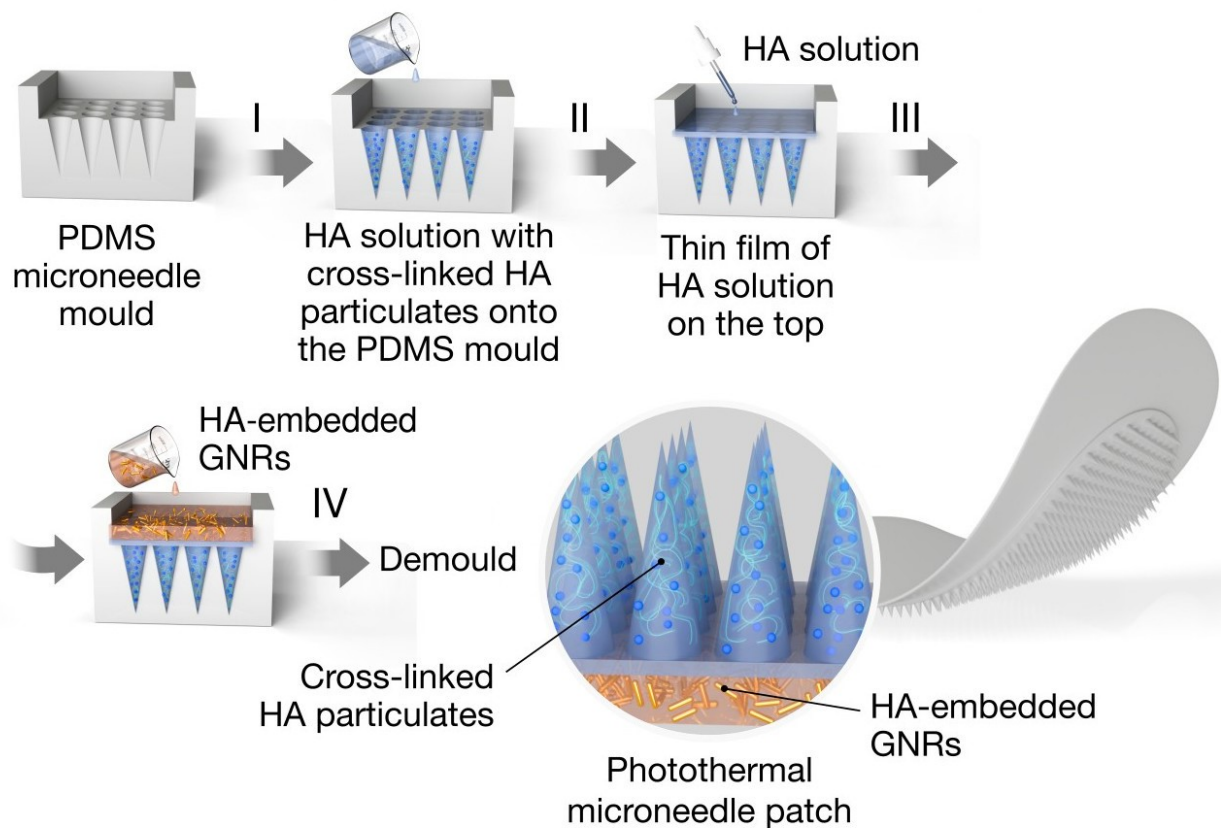

**Fig. S1. Fabrication of a photothermal-responsive soluble microneedle eye patch.** A PDMS microneedle mould is (I) filled with a hyaluronic-acid (HA) solution containing cross-linked HA particulates to form dissolvable tips, (II–III) overcoated with a thin HA film, and (IV) capped with a hydrocolloid backing loaded with HA-embedded gold nanorods (GNRs), then demoulded. The resulting patch comprises HA microneedle tips with dispersed cross-linked HA particulates on a backing that incorporates HA–GNRs for photothermal activation. Abbreviations: PDMS, polydimethylsiloxane; HA, hyaluronic acid; GNRs, gold nanorods.

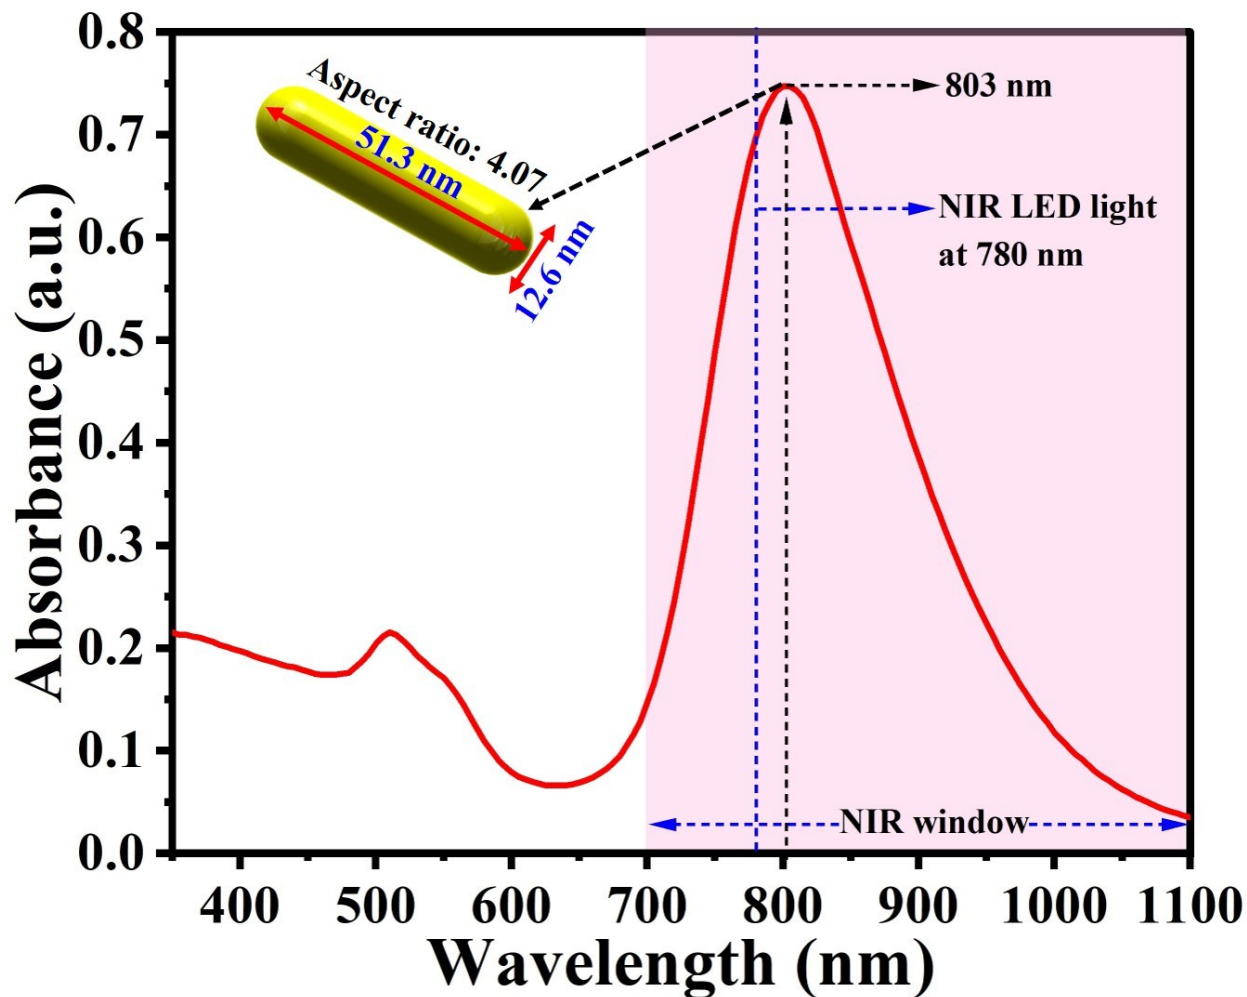

**Fig. S2. UV-vis-NIR absorption of gold nanorods and overlap with the excitation source.** Spectrum of a GNR dispersion showing a longitudinal LSPR maximum at  $\sim 803$  nm; the shaded band marks the NIR tissue window ( $\approx 700$ – $1,100$  nm). The near-infrared (NIR) LED used in this study (780 nm) lies close to the LSPR peak. Inset, schematic of a representative GNR (length  $\sim 51.3$  nm, diameter  $\sim 12.6$  nm; aspect ratio  $\sim 4.1$ ).

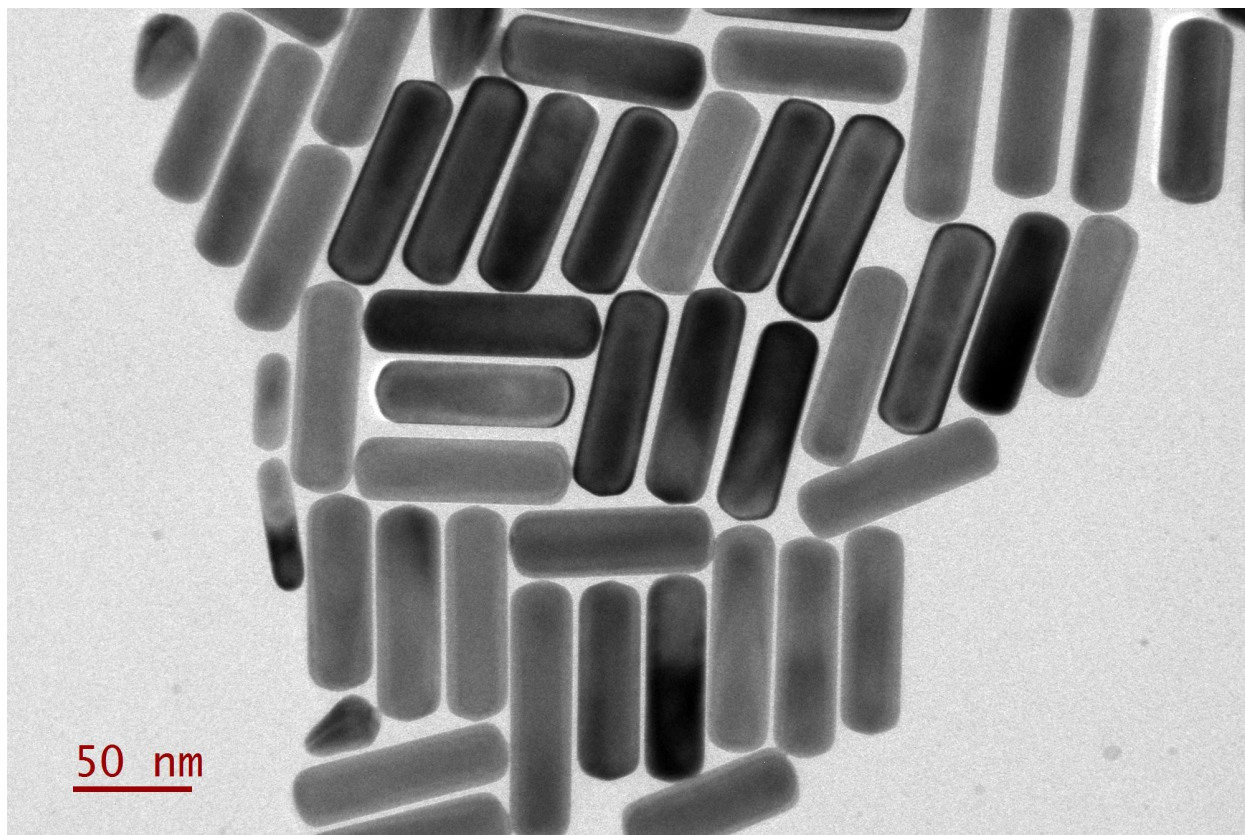

**Fig. S3. Transmission electron microscopy (TEM) of gold nanorods.** Representative TEM micrograph showing monodisperse rod-shaped Au nanoparticles with rounded ends (typical length  $\sim 51$  nm, diameter  $\sim 13$  nm; aspect ratio  $\sim 4.1$ ). Scale bar, 50 nm.

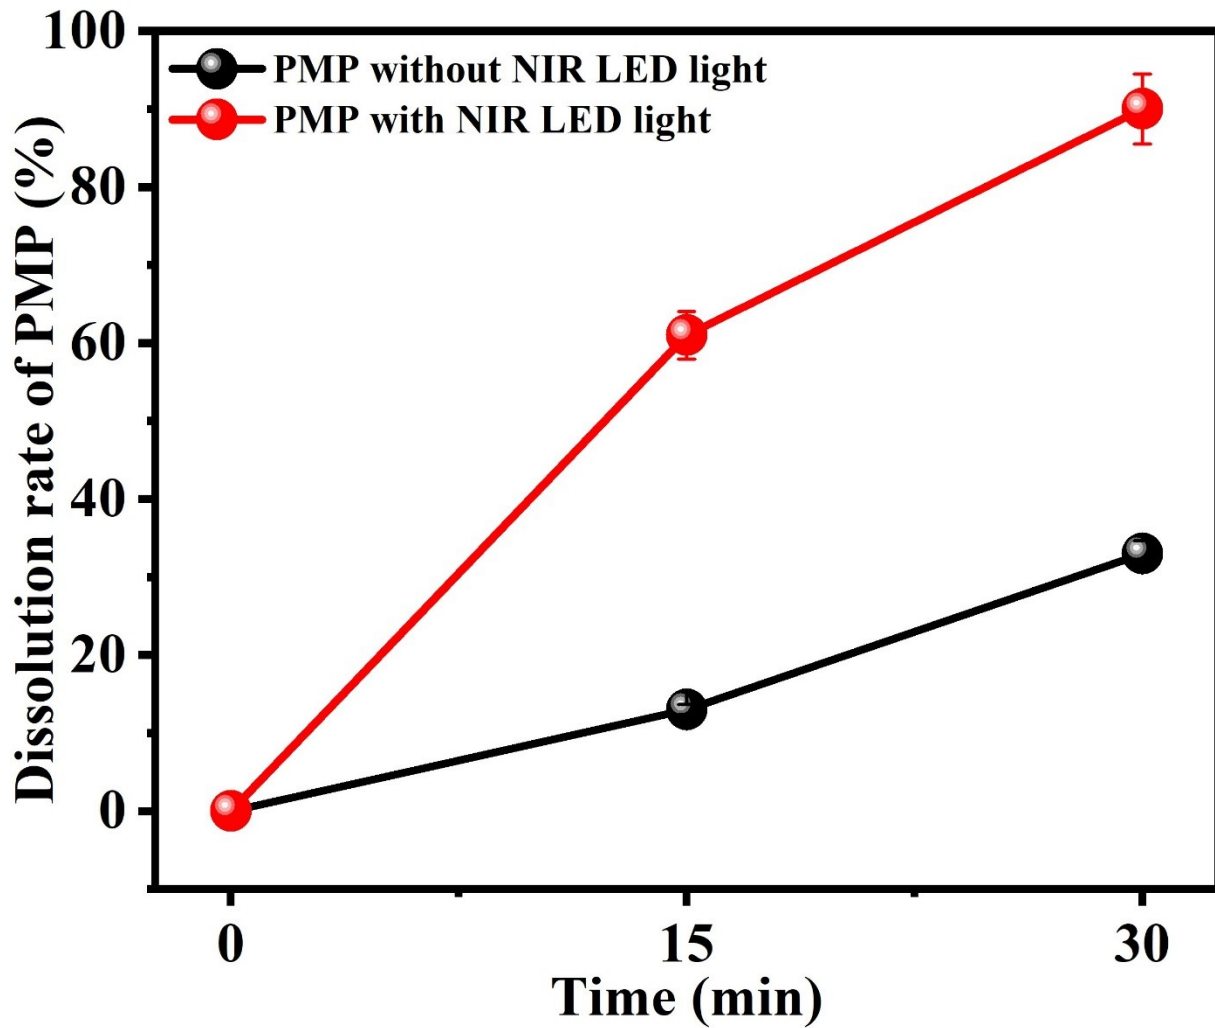

**Fig. S4. NIR illumination accelerates dissolution of the photothermal microneedle patch (PMP).** Fractional dissolution of the PMP was measured at 0, 15, and 30 min with or without NIR-LED (~780 nm) exposure. NIR-LED markedly increases the dissolution fraction at both time points relative to the no-light control. Data are mean  $\pm$  s.d.; replicate numbers are provided in the Methods.

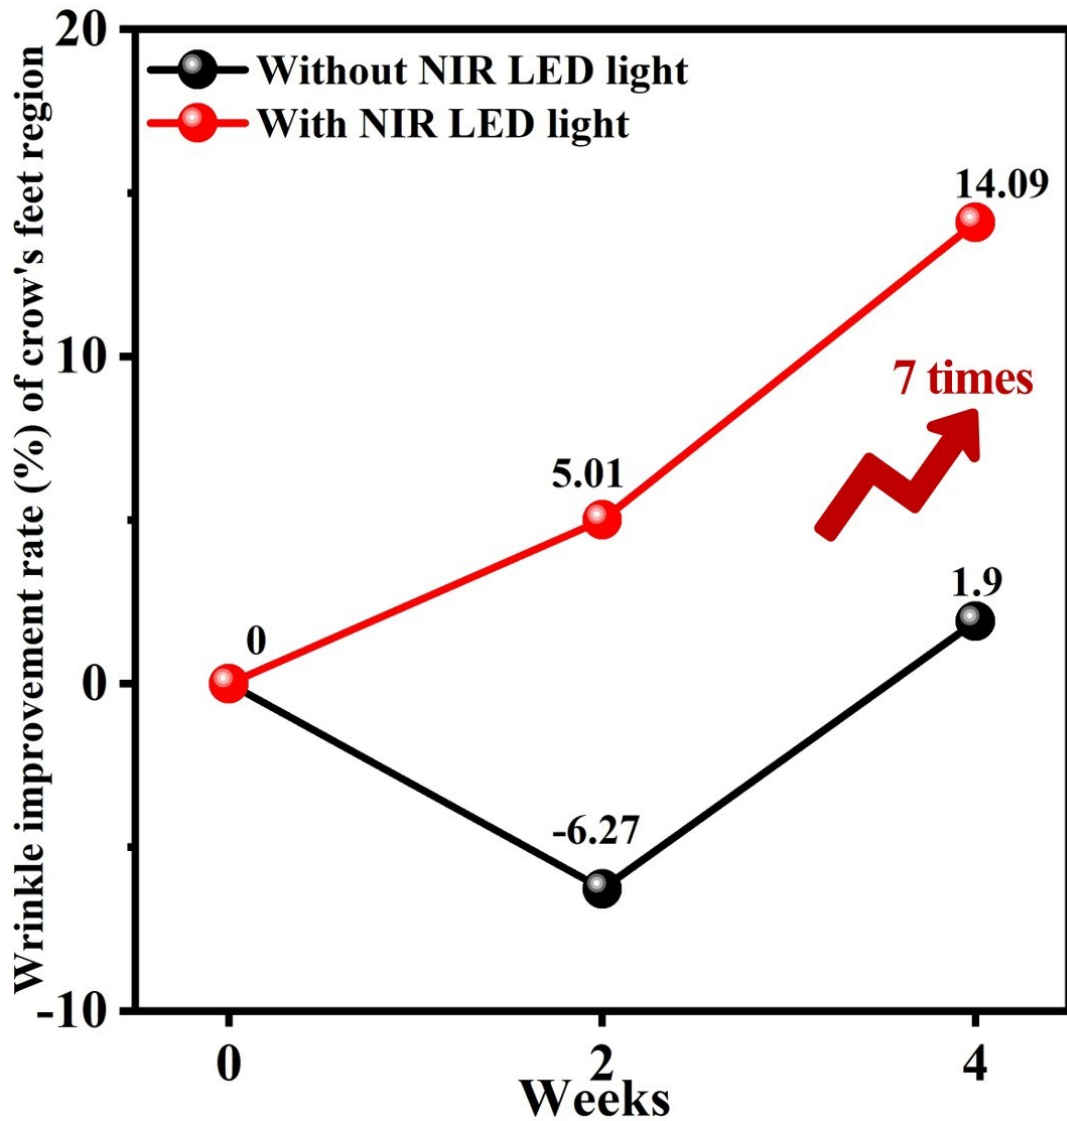

**Fig. S5. Crow's-feet wrinkle improvement with and without NIR illumination.** Percentage change in wrinkle grade relative to baseline at weeks 2 and 4 for participants using the PMP with NIR-LED versus without NIR-LED. The NIR-LED group shows greater improvement at both time points; by week 4, the mean improvement was ~14.1% with NIR-LED versus ~1.9% without NIR-LED (~7-fold difference). Data are presented as means  $\pm$  SD (n = 20 participants).

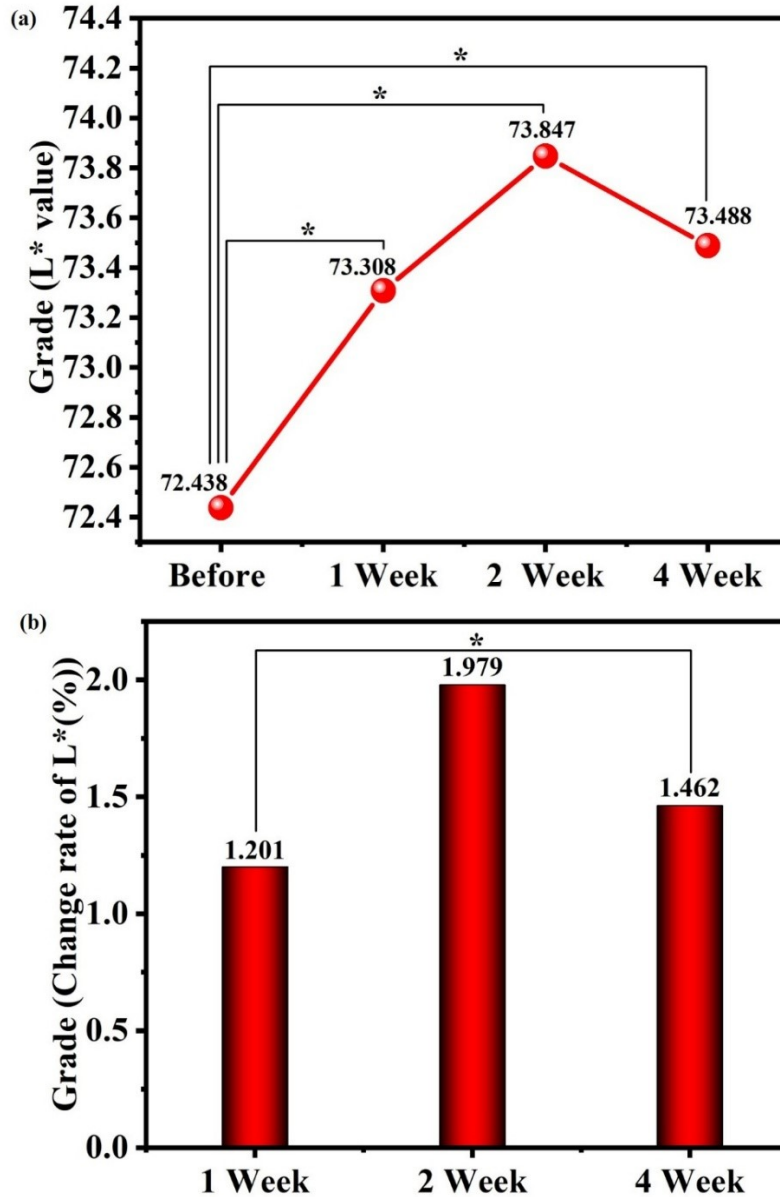

**Fig. S6. Brightening of the periorbital skin during treatment with a PMP and NIR LED.** (a) VISIA-CR measurements of skin brightness ( $L^*$ ) at baseline and after 1, 2, and 4 weeks of treatment with the PMP plus NIR-LED. (b) Percentage change in  $L^*$  relative to baseline at the same time points. Statistics: repeated-measures ANOVA with Bonferroni-corrected post-hoc comparisons; \* indicates  $p < 0.05$  versus baseline. Data are presented as means  $\pm$  SD ( $n = 20$  participants).

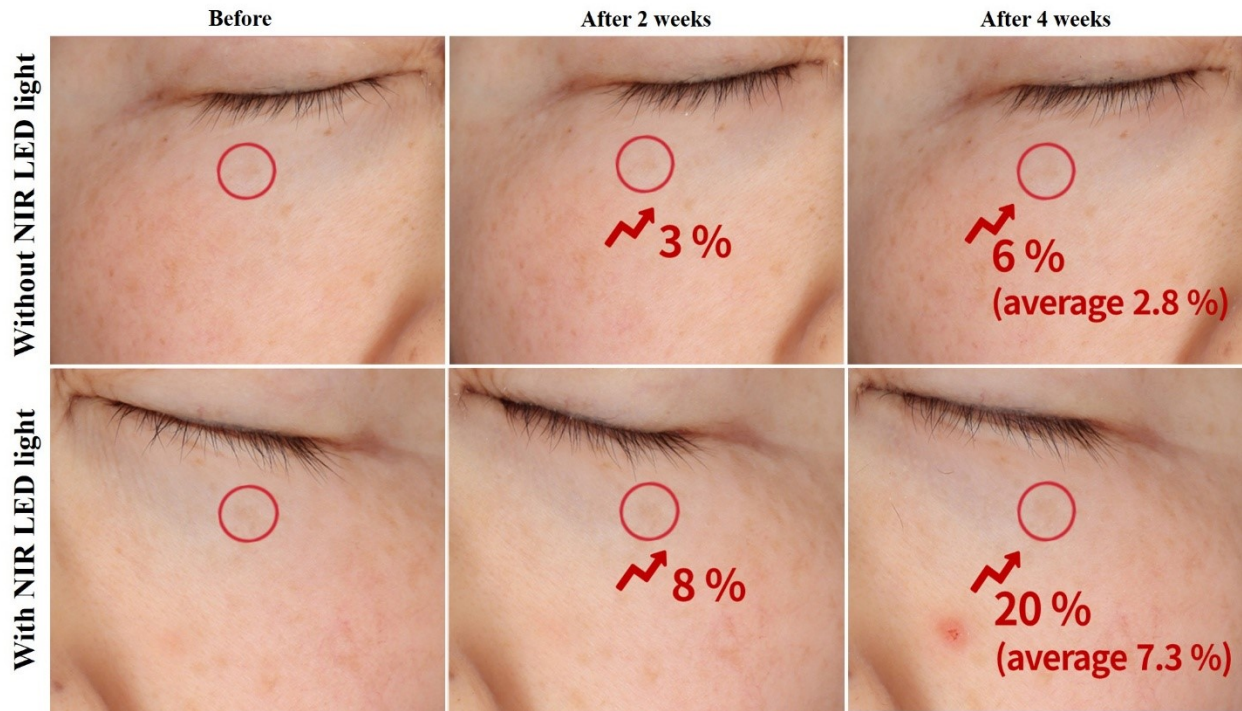

**Fig. S7. Reduction of facial pigmentation with a PMP, with and without NIR illumination.**

Representative clinical photographs at baseline, 2 weeks, and 4 weeks for treatment without NIR-LED (top row) and with NIR-LED (bottom row). Red circles mark regions of interest used for color analysis. Percent labels denote relative brightening (decrease in melanin/increase in lightness) for the example shown; mean change at week 4 was ~2.8% without NIR-LED and ~7.3% with NIR-LED. The addition of NIR-LED is associated with a greater reduction in pigmented spots by week 4. Data are presented as means  $\pm$  SD (n = 20 participants).

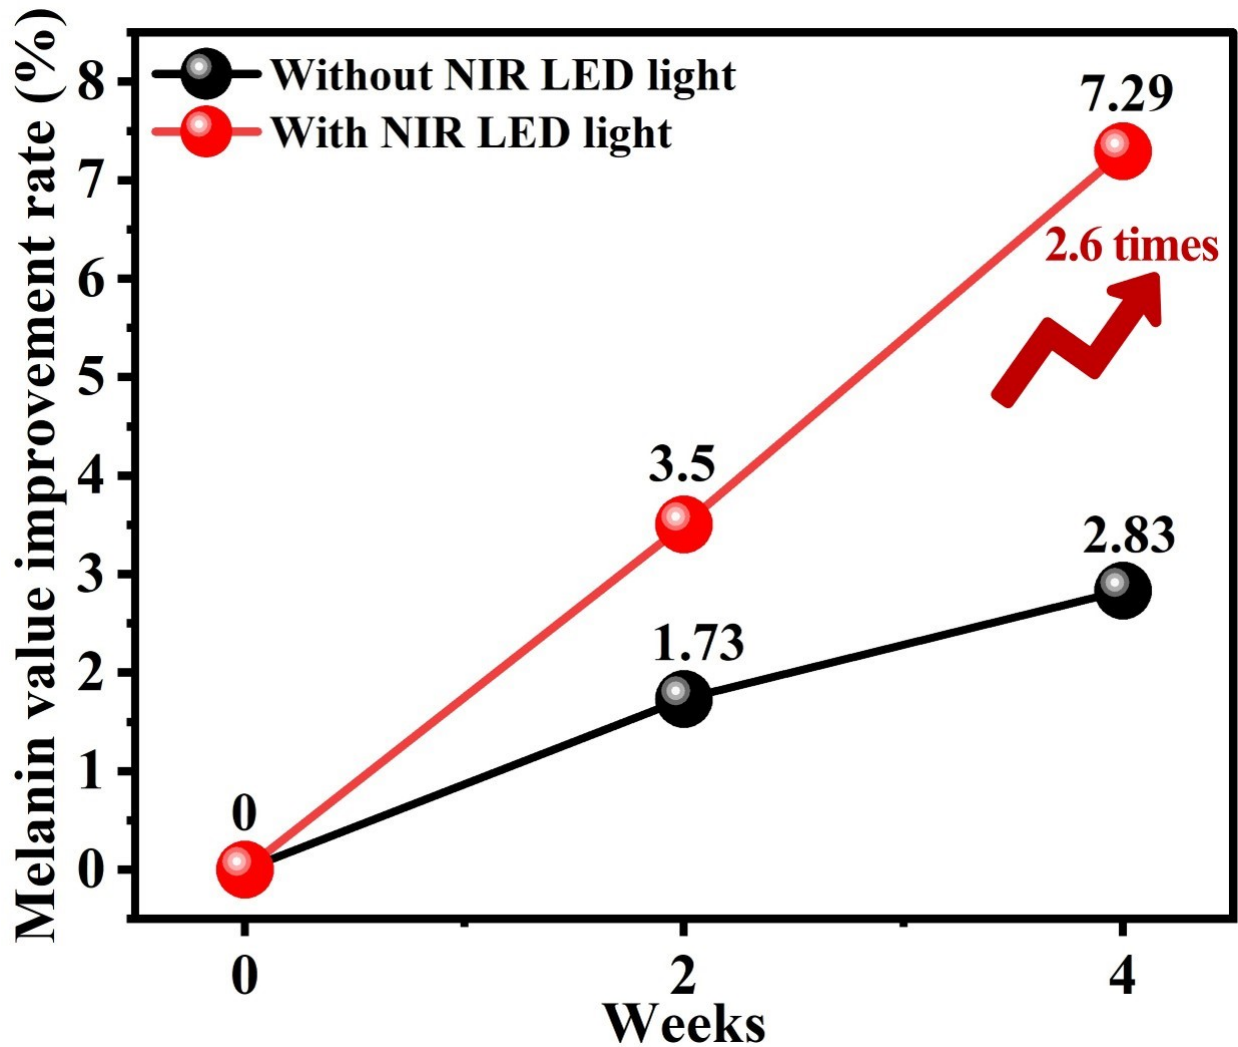

**Fig. S8. Reduction in facial melanin with a PMP, with and without NIR illumination.** Percentage change in melanin value (lightness increase) at baseline, 2 weeks, and 4 weeks for treatment with NIR-LED versus without NIR-LED. By week 4, the mean improvement was 7.29% with NIR-LED compared with 2.83% without NIR-LED ( $\approx 2.6$ -fold greater). Data are presented as means  $\pm$  SD (n = 20 participants).

**Table S1.** Measure the results of wrinkles around the eyes using PRIMOS.

| <b>Weeks</b>    | <b>Mean ± SD.</b> | <b>Mean Difference (%)</b> | <b>p-value</b> |
|-----------------|-------------------|----------------------------|----------------|
| Before (0 week) | 28.147 ± 8.352    |                            |                |
| 1 week          | 25.602 ± 7.889    | - 8.658                    | <0.001*        |
| 2 weeks         | 24.147 ± 7.572    | - 13.598                   | <0.001*        |
| 4 weeks         | 23.417 ± 7.375    | - 16.336                   | <0.001*        |

\**p* <0.017 by Friedman Test, post hoc Wilcoxon Signed Rank Test with Bonferroni correction. Values are expressed as mean ± SD (n = 20 participants).

**Table S2.** Measure the results of skin brightness using VISIA-CR.

| <b>Weeks</b>    | <b>Mean ± SD.</b> | <b>Mean Difference (%)</b> | <b>p-value</b> |
|-----------------|-------------------|----------------------------|----------------|
| Before (0 week) | 72.438 ± 3.069    |                            |                |
| 1 week          | 73.308 ± 2.990    | 1.201                      | <0.008*        |
| 2 weeks         | 73.847 ± 2.568    | 1.979                      | <0.001*        |
| 4 weeks         | 73.488 ± 3.183    | 1.462                      | <0.007*        |

\**p* <0.05 by repeated measures ANOVA, post hoc Bonferroni correction. Values are expressed as mean ± SD (n = 20 participants).
